# Supplementary material for: Impact of global cooling on Early Cretaceous high pCO2 world during the Weissert Event
Source: Nat Commun. 2021 Sep 13;12:5411. doi: 10.1038/s41467-021-25706-0 (PMC8437947; doi:10.1038/s41467-021-25706-0)
Supplement: Supplementary file 3 — Source data [file 41467_2021_25706_MOESM3_ESM.xlsx]

## Sheet: ODP 692 TEX86 
																																"min TEX86" estimates		"max TEX86" estimates
ODP 692		GDGT-4	GDGT-0	GDGT-1	GDGT-2	GDGT-3	Cren	Cren'		MI	%GDGT-0	ΔRI	Ring Index	Cren'		%GDGT_RS	GDGT2:GDGT3	fGDGT2	fGDGT3	fcren	fcren'	Abundance of cren'		Schouten et al. (2002)	Kim et al. (2010)		Kim et al. (2010)	O'Brien et al. (2017)	Kim et al. (2012)	Ho & Laepple (2016)		Kim et al. (2015)	Tierney & Tingley (2014, 2015)	Tierney & Tingley (2014, 2015)	Tierney & Tingley (2014, 2015)				Schouten et al. (2004)
LEG	Sample name	1294	1302	1300	1298	1296	1292	1292'		Zhang et al. (2011)	Sinninghe Damste’ et al. (2012)	Zhang et al. (2016)	Zhang et al. (2016)	O'Brien et al. (2017)										TEX86	GDGT-index 2 (TEX-H)		SST - TEX-H	TEX86-LINEAR	(0-200m) T-H	(0-1000m) T-H		SST - TEX-H (deep restricted)	BAYSPAR 5th	BAYSPAR 50th	BAYSPAR 95th		TOC%		C31ββ(αβ+βα+ββ)
113	692B-10R-1-9-12	194052	179221	40051.3	42629.6	9052.08	417932	37242.6		0.16773	30.0125	-0.0800608	2.71738	0.0818206		17.2051	4.70937	0.0587081	0.0124662	0.575562	0.0512893	0.288757		0.689466	-0.161487		27.5543	29.3803	21.8667	15.7113		21.1083	21.6017	27.1325	32.8053		9.6012
113	692B-10R-1-25-28	366462	407775	78820.9	84022.5	14186.2	751184	70916.2		0.177184	35.1846	0.0664169	2.54305	0.0862622		14.8146	5.92284	0.0597215	0.0100833	0.533927	0.0504058	0.286015		0.682104	-0.166149		27.2354	28.9473	21.6116	15.5211		20.8458	21.1872	26.7145	32.3644		8.006		0.626795
113	692B-10R-1-32-35	39996.2	31773.4	7551.67	8233.47	1778.29	85762.4	9396.54		0.155811	27.0329	-0.0811198	2.83738	0.0987457		22.8238	4.62999	0.0569807	0.0123069	0.593529	0.0650298	0.348537		0.719893	-0.142732		28.8371	31.1702	22.8926	16.4765		22.1642	23.5556	29.0158	35.0417		11.3877
113	692B-10R-1-54-57	155563	149749	33729.2	35955.6	7293.78	323931	28836		0.179126	31.614	-0.0488261	2.65505	0.0817425		16.1469	4.92962	0.0620465	0.0125865	0.558989	0.0497607	0.272515		0.681243	-0.166698		27.1979	28.8966	21.5816	15.4987		20.8149	21.1122	26.6687	32.3021		4.9886
113	692B-10R-1-67-70	128949	136363	26479.5	26769	6632.34	272457	21753		0.169112	33.3552	-0.0179421	2.60321	0.0739371		13.7577	4.03614	0.0545802	0.0135229	0.55552	0.0443529	0.26647		0.675631	-0.17029		26.9521	28.5665	21.3851	15.3522		20.6127	20.7776	26.3199	31.9012		10.11
113	692B-10R-1-111-115	152373	164972	40017.6	44964.4	6064.13	343695	39882.8		0.191828	32.4322	0.0255304	2.63049	0.103976		19.4688	7.41481	0.0703012	0.00948118	0.537363	0.0623563	0.304614		0.694356	-0.158418		27.7642	29.668	22.0346	15.8366		21.2811	21.9432	27.4695	33.19		10.3341
113	692B-10R-2-10-13	65022.1	67308.9	15131.1	15843	3046.03	139600	12264.4		0.183018	32.5307	-0.0443524	2.62018	0.0807587		15.4127	5.2012	0.0625728	0.0120305	0.551357	0.0484387	0.264977		0.673085	-0.17193		26.84	28.4167	21.2954	15.2852		20.5203	20.5842	26.1624	31.7251		10.23
113	692B-10R-2-50-54	189330	250371	49935.8	50597	7608.1	414461	38980		0.192565	37.6592	0.082015	2.44807	0.0859648		13.4715	6.65042	0.0623153	0.00937013	0.51045	0.0480077	0.264952		0.66058	-0.180075		26.2829	27.6812	20.8499	14.9529		20.0618	19.7262	25.4087	30.8864		6.9339
113	692B-10R-2-69-72	83913.6	94336.1	19480.8	19395.9	3978.52	181074	14204.8		0.179963	34.253	-0.0376904	2.5606	0.0727412		13.087	4.87515	0.0583388	0.0119666	0.544632	0.0427251	0.248945		0.658591	-0.181384		26.1933	27.5642	20.7783	14.8995		19.9881	19.5909	25.2659	30.7174		8.492
113	692B-10R-2-96-99	14627.3	10683.2	2802.99	3431.4	625.58	30773	3489.89		0.166816	25.7698	-0.0745054	2.86828	0.101856		24.6234	5.48515	0.0662355	0.0120754	0.594004	0.0673645	0.337192		0.729176	-0.137168		29.2177	31.7162	23.1969	16.7036		22.4775	24.1216	29.5749	35.6955		12.519
113	692B-10R-3-27-30	114994	105298	25132.2	29747.1	5283.09	240691	25459.2		0.18437	30.4338	0.00367057	2.69937	0.0956573		19.4707	5.63063	0.0689212	0.0122404	0.557659	0.0589866	0.297346		0.706474	-0.150904		28.2782	30.3808	22.4455	16.1431		21.7041	22.7081	28.1902	34.0155		9.947		0.570592
113	692B-10R-3-50-54	19078.1	16974.7	3479.4	4023.78	848.11	38149.6	3980.9		0.165432	30.7935	0.0412901	2.70683	0.0944897		18.9968	4.74441	0.05965	0.0125727	0.565544	0.0590143	0.322806		0.71786	-0.14396		28.7531	31.0506	22.8254	16.4264		22.095	23.4338	28.9003	34.8477		5.872
113	692B-10R-3-93-96	322299	300138	68549.3	76596.2	12139.6	683566	60724.7		0.174456	30.511	-0.0697348	2.69226	0.0815873		16.8276	6.3096	0.0637391	0.0101019	0.568826	0.0505317	0.278541		0.685568	-0.16395		27.3858	29.151	21.732	15.6109		20.9696	21.3942	26.929	32.572		5.3712
113	692B-10R-3-131-134	60747.6	56019.1	13144	15956.3	2803.21	129212	13602.7		0.1826	30.2427	0.013974	2.70752	0.0952471		19.538	5.69216	0.0691535	0.0121489	0.559997	0.0589532	0.29892		0.71116	-0.148033		28.4746	30.6565	22.6026	16.2603		21.8658	23.0188	28.4796	34.3669		4.9243
113	692B-10R-4-1-4	85595.1	93873.2	20958.6	24987.4	3379.48	187582	17976.6		0.193521	33.3528	0.0439108	2.59007	0.0874526		16.0721	7.39385	0.0716469	0.00969006	0.537858	0.0515448	0.267104		0.688589	-0.16204		27.5165	29.3288	21.8364	15.6888		21.0772	21.5806	27.1141	32.7894		5.0544
113	692B-10R-4-14-17	481979	447250	93945.5	104131	22462.7	1.02559e+06	89700.4		0.165095	30.3665	-0.0423155	2.70922	0.0804277		16.7055	4.63574	0.0583995	0.0125977	0.575179	0.0503064	0.289132		0.697184	-0.156653		27.885	29.8344	22.1311	15.9086		21.3805	22.1625	27.6368	33.438		10.5798
113	692B-10R-4-32-35	462165	388675	92784	116057	20427	963743	103825		0.17679	28.7393	-0.000135572	2.76263	0.0972538		21.0812	5.68154	0.0688556	0.0121192	0.571781	0.0615985	0.3117		0.721447	-0.141795		28.9012	31.2616	22.9438	16.5147		22.2169	23.648	29.094	35.1388		6.881
113	692B-10R-4-61-65	174664	262713	50611.5	50016.4	7909.38	375443	27429.7		0.212231	41.1675	0.108049	2.30695	0.0680853		9.45388	6.32368	0.0646104	0.0102172	0.484992	0.0354333	0.201738		0.627766	-0.202202		24.7694	25.7509	19.6395	14.0502		18.816	17.5563	23.391	28.691		6.4932
113	692B-10R-4-91-94	12302.5	12512.2	2755.34	2689.44	596.15	25805.5	2150.28		0.177692	32.6539	-0.0765651	2.61769	0.0769172		14.6652	4.51135	0.0578263	0.012818	0.55485	0.0462337	0.262511		0.663622	-0.178079		26.4194	27.8601	20.9591	15.0344		20.1742	19.9426	25.5778	31.0758		8.612
113	692B-10R-4-126-129	649278	613555	134591	147587	21664	1.36352e+06	142668		0.167865	31.0334	-0.0177649	2.69003	0.0947208		18.8658	6.81252	0.0608959	0.00893882	0.562605	0.0588663	0.319518		0.698571	-0.15579		27.944	29.9159	22.1783	15.9438		21.429	22.1977	27.719	33.5163		5.1875
113	692B-10R-5-11-14	594216	741365	148097	146841	26292	1.30076e+06	115440		0.184888	36.3036	0.0357137	2.49535	0.0815136		13.4733	5.58502	0.0592389	0.0106068	0.524756	0.0465709	0.264364		0.660849	-0.179898		26.295	27.697	20.8596	14.9602		20.0718	19.7767	25.4121	30.8891		6.9745
113	692B-10R-5-23-26	166552	165925	35766.5	37501.9	6680.36	347367	27994.7		0.175592	32.3257	-0.06793	2.62744	0.0745807		14.4362	5.61375	0.0603666	0.0107533	0.559155	0.045063	0.259346		0.668655	-0.174798		26.6438	28.1562	21.1386	15.1683		20.3589	20.2621	25.8866	31.4441		8.608		0.533985
113	692B-10R-5-50-53	482833	418684	97029.2	105614	18242.9	971865	88795.2		0.172359	30.1093	-0.0820914	2.70883	0.0837169		17.4973	5.7893	0.0621173	0.0107297	0.571608	0.0522254	0.286731		0.68668	-0.163246		27.434	29.2165	21.7705	15.6396		21.0093	21.4476	26.9858	32.6736		3.2436
113	692B-10R-5-113-115	354906	332966	70767.8	71574	15484.1	760793	65768.5		0.160329	30.4424	-0.0926951	2.70741	0.0795688		16.4943	4.62242	0.0543317	0.0117539	0.577516	0.0499247	0.294142		0.683499	-0.165262		27.2961	29.0294	21.6602	15.5573		20.8957	21.2585	26.7954	32.4189		4.9919
113	692B-10R-5-139-141	195598	152864	38192.8	43743.8	7688.39	401522	38519.9		0.16921	27.5736	-0.111417	2.79682	0.0875369		20.127	5.68959	0.0640906	0.0112645	0.588284	0.0564369	0.300597		0.701956	-0.15369		28.0876	30.1151	22.2932	16.0294		21.5473	22.4323	27.9127	33.7265		3.8419
113	692B-10R-5-148-150	636754	619540	133271	149617	25062.3	1.35174e+06	110688		0.173946	31.4283	-0.052314	2.66009	0.0756876		15.158	5.9698	0.0626034	0.0104867	0.565601	0.0463144	0.264399		0.681656	-0.166435		27.2159	28.9209	21.596	15.5095		20.8297	21.1286	26.6787	32.2713		8.3249
113	692B-10R-6-1-5	50526.6	36123.6	9247.79	11526.3	1895.53	110823	11695.6		0.156139	24.5828	-0.111664	2.91245	0.0954594		24.4579	6.08077	0.0635716	0.0104545	0.611229	0.0645053	0.340332		0.730897	-0.136144		29.2877	31.8174	23.2529	16.7453		22.5351	24.2291	29.6847	35.8003		7.7964
113	692B-10R-6-25-27	109100	104364	23546.4	24969.8	4749.22	231476	20004		0.174787	31.0754	-0.0768049	2.67326	0.0795452		16.0846	5.25767	0.0610347	0.0116087	0.565805	0.0488966	0.27302		0.678633	-0.168365		27.0838	28.7431	21.4904	15.4307		20.721	20.9485	26.5016	32.0866		3.1851
113	692B-10R-6-49-51	413648	351490	86278.7	95961	16061.1	886807	92024.1		0.168461	28.385	-0.0860943	2.77486	0.0940143		20.7489	5.97476	0.0627761	0.0105069	0.580135	0.0602007	0.316969		0.70282	-0.153156		28.1241	30.1659	22.3224	16.0512		21.5773	22.4824	27.9649	33.7992		7.6282
113	692B-10R-6-71-74	86123.4	73711.3	18556.2	19932.5	4280.12	188639	18393.1		0.171212	28.0965	-0.115404	2.78008	0.0888418		19.9699	4.65701	0.061613	0.0132302	0.583097	0.0568544	0.300728		0.696606	-0.157013		27.8603	29.8004	22.1114	15.8939		21.3602	22.0598	27.5981	33.3577		6.0458
113	692B-10R-6-96-98	111082	82036.4	22760.6	27819.1	5161.97	233337	29856.9		0.174774	26.0125	-0.0457986	2.8597	0.113441		26.6834	5.38924	0.0693791	0.0128736	0.581929	0.0744613	0.348801		0.734101	-0.134244		29.4177	32.0059	23.3568	16.8228		22.642	24.4483	29.8844	36.0292		11.3843
113	692B-12R-1-12-14	181279	168659	36020	38953	7194.37	387013	36598.1		0.162457	30.3523	-0.0482121	2.7133	0.0863955		17.8303	5.41438	0.0577563	0.0106672	0.573831	0.0542646	0.308154		0.696713	-0.156946		27.8649	29.8067	22.1151	15.8966		21.3639	22.132	27.5869	33.3905		5.3986
113	692B-12R-1-41-44	180006	164446	39271.1	45399.4	6609.52	386239	47046.3		0.174011	29.8621	0.00812994	2.73296	0.10858		22.2449	6.86879	0.0658907	0.00959277	0.56057	0.0682809	0.340111		0.716098	-0.145027		28.6801	30.947	22.767	16.3829		22.035	23.3375	28.7868	34.7073		6.8424
113	692B-12R-1-71-74	280730	268649	58810.9	79829.3	11926.7	650399	68757.6		0.17312	29.2312	0.054391	2.75031	0.0956087		20.3783	6.69331	0.0701258	0.010477	0.571341	0.0603999	0.313497		0.731854	-0.135575		29.3266	31.8738	23.284	16.7685		22.5671	24.3558	29.7582	35.8767		4.4565
113	692B-12R-1-95-98	77108	60119.3	15769.1	20687.1	2954.59	167176	21874.7		0.172505	26.4498	0.000267803	2.84915	0.115708		26.6784	7.00168	0.0716855	0.0102383	0.579305	0.0758008	0.356931		0.742694	-0.12919		29.7634	32.5114	23.6333	17.029		22.9266	24.9413	30.4002	36.7001		4.398		0.558276
113	692B-12R-1-118-121	58484.4	49322.3	12629.2	15288.8	2156.65	123823	17167		0.175808	28.486	0.0236683	2.78436	0.12176		25.8192	7.08912	0.0693722	0.00978573	0.561845	0.0778947	0.363388		0.732668	-0.135092		29.3597	31.9217	23.3104	16.7882		22.5943	24.3505	29.7934	35.9252		6.0761
113	692B-12R-2-10-13	108454	83593.1	20203.7	26311.8	4075.71	231898	27381.3		0.163266	26.4962	-0.0101243	2.85203	0.105605		24.6735	6.45576	0.0668723	0.0103586	0.589376	0.0695904	0.351166		0.740887	-0.130248		29.691	32.4051	23.5754	16.9859		22.867	24.8811	30.2925	36.5353		4.4172
113	692B-12R-2-45-48	18789.4	17251.1	4024.91	5065.55	780.1	40573.2	5025.7		0.177946	29.8337	0.0613141	2.73501	0.110215		22.5602	6.49346	0.0696577	0.0107274	0.557933	0.0691097	0.33738		0.729804	-0.136794		29.2433	31.7532	23.2174	16.7188		22.4985	24.1967	29.6206	35.7509		4.6895
113	692B-12R-2-71-73	2991.52	2671.74	796.74	795.31	182.99	6001.99	783.97		0.20734	30.8027	-0.0436775	2.6779	0.115528		22.6862	4.34619	0.0708028	0.0162908	0.53433	0.0697933	0.306357		0.688653	-0.162		27.5192	29.3325	21.8386	15.6904		21.0794	21.5933	27.1179	32.8228		4.7468
113	692B-12R-2-97-101	56134.7	65135.1	14421.2	16345.3	2659.78	120517	16182.2		0.196479	35.0844	0.155763	2.55839	0.118378		19.9001	6.14535	0.0694773	0.0113057	0.512271	0.0687843	0.326199		0.709301	-0.14917		28.3968	30.5471	22.5404	16.2139		21.8017	22.9111	28.3823	34.2809		5.1793
113	692B-12R-2-119-122	87307	68989.9	18339.6	21980.1	3516.96	185400	25371.8		0.172173	27.1197	-0.0128438	2.83048	0.120376		26.8878	6.24974	0.0679239	0.0108683	0.572933	0.0784053	0.3666		0.735009	-0.133707		29.4544	32.0594	23.3862	16.8447		22.6723	24.517	29.9446	36.113		3.2988
113	692B-12R-2-142-145	277035	192207	47353.3	58101.1	11952.5	592223	53831.8		0.153782	24.5028	-0.142128	2.91276	0.0833239		21.8794	4.86101	0.0607963	0.0125069	0.619695	0.056329	0.314367		0.723466	-0.140582		28.9842	31.3804	23.0102	16.5643		22.2852	23.8054	29.2277	35.2861		4.6874
113	692B-12R-3-9-12	92673.7	67605	18344	22913.4	4705.69	193617	25096.9		0.173657	25.8803	-0.0225607	2.86848	0.114748		27.0727	4.86929	0.0689577	0.0141617	0.582688	0.075529	0.353179		0.741852	-0.129683		29.7297	32.4619	23.6063	17.0089		22.8989	24.908	30.3497	36.645		6.9181
113	692B-12R-3-18-21	189534	179784	44000.6	50773	7907.27	435277	58642.2		0.17211	29.2302	0.02321	2.76274	0.118728		24.5956	6.42105	0.0653968	0.0101847	0.560647	0.0755325	0.363508		0.727252	-0.138315		29.1392	31.6031	23.1342	16.6567		22.4129	24.0139	29.4444	35.5544		6.354
113	692B-12R-3-42-45	100930	79097.4	18829.5	23897.7	3980.91	210112	30289.1		0.162684	27.3496	0.0626585	2.8404	0.125994		27.69	6.00307	0.0652575	0.0108707	0.573752	0.0827104	0.393379		0.755452	-0.121793		30.2694	33.2619	24.0379	17.3309		23.3431	25.7476	31.1822	37.5931		4.2439
113	692B-12R-3-76-79	325459	296261	68688.4	73650.3	15878.1	721628	71157.4		0.166369	29.1054	-0.073946	2.75384	0.0897562		19.3669	4.63847	0.0590495	0.0127304	0.578569	0.0570508	0.310224		0.70054	-0.154567		28.0276	30.0318	22.2452	15.9937		21.4979	22.3426	27.8284	33.6019		7.235		0.491009
113	692B-12R-3-93-96	173838	115032	32096.1	47907.7	6890.45	375153	49751.2		0.169782	23.4671	-0.00409508	2.94848	0.117088		30.1919	6.95276	0.0764284	0.0109925	0.598492	0.0793695	0.36409		0.765114	-0.116274		30.6469	33.8302	24.3398	17.556		23.6538	26.3038	31.7818	38.3314		6.2033
113	692B-12R-3-112-115	41649.7	33865.3	8850.09	11300.6	1637.71	88040.1	11098.7		0.180178	27.78	0.00400771	2.79677	0.111951		24.6836	6.90028	0.0730051	0.01058	0.568762	0.0717007	0.337479		0.730895	-0.136145		29.2877	31.8174	23.2529	16.7453		22.5351	24.2399	29.7022	35.7897		5.34
									avg	0.17497	30.1356	-0.0203507	2.71521	0.0948603		19.8491	5.74215					0.308078		0.703687	-0.152981		28.1361	30.2169	22.3319	16.0584		21.5872	22.5186	28.0264	33.885		6.75072		0.556131
									min	0.153782	23.4671	-0.142128	2.30695	0.0680853		9.45388	4.03614					0.201738		0.627766	-0.202202		24.7694	25.7509	19.6395	14.0502		18.816	17.5563	23.391	28.691		3.1851		0.491009
									max	0.212231	41.1675	0.155763	2.94848	0.125994		30.1919	7.41481					0.393379		0.765114	-0.116274		30.6469	33.8302	24.3398	17.556		23.6538	26.3038	31.7818	38.3314		12.519		0.626795

## Sheet: ODP 692 δ13Corg 
LEG	Sample name	δ13CV-PDB (‰)	TOC%
113	692B-10R-1-9-12	-30.8295	9.6012
113	692B-10R-1-25-28	-30.4419	8.006
113	692B-10R-1-32-35	-30.1297	11.3877
113	692B-10R-1-42-45	-31.2803	7.6326
113	692B-10R-1-54-57	-30.567	4.9886
113	692B-10R-1-62-66	-30.8745	9.307
113	692B-10R-1-67-70	-30.4884	10.11
113	692B-10R-1-87-90	-30.2833	8.4773
113	692B-10R-1-98-101	-30.989	8.542
113	692B-10R-1-111-115	-30.9011	10.3341
113	692B-10R-2-1-4	-30.9752	9.5023
113	692B-10R-2-10-13	-31.1041	10.23
113	692B-10R-2-23-26	-30.6109	8.24
113	692B-10R-2-60-64	-30.9606	5.2482
113	692B-10R-2-69-72	-31.1201	8.492
113	692B-10R-2-85-87	-30.642	10.8
113	692B-10R-2-96-99	-30.332	12.519
113	692B-10R-2-109-112	-30.3962	6.238
113	692B-10R-2-110-114	-30.8427	7.1587
113	692B-10R-2-123-126	-31.4809	10.69
113	692B-10R-3-1-4	-30.5364	9.37
113	692B-10R-3-11-14	-30.5372	8.37
113	692B-10R-3-27-30	-31.4237	9.947
113	692B-10R-3-43-45	-30.3512	6.1448
113	692B-10R-3-50-54	-30.4645	5.872
113	692B-10R-3-60-64	-30.494	6.3163
113	692B-10R-3-70-73	-30.3099	5.4708
113	692B-10R-3-82-85	-30.5352	5.888
113	692B-10R-3-93-96	-30.6864	5.3712
113	692B-10R-3-115-118	-30.2441	6.259
113	692B-10R-3-118-121	-30.2787	7.3072
113	692B-10R-3-120-124	-30.4345	4.8437
113	692B-10R-3-131-134	-30.05	4.9243
113	692B-10R-4-1-4	-30.2281	5.0544
113	692B-10R-4-14-17	-30.5897	10.5798
113	692B-10R-4-22-25	-30.3138	7.239
113	692B-10R-4-32-35	-30.0991	6.881
113	692B-10R-4-42-45	-29.85	5.9796
113	692B-10R-4-55-58	-30.1425	5.887
113	692B-10R-4-61-65	-30.0305	6.4932
113	692B-10R-4-73-75	-29.9205	4.5189
113	692B-10R-4-81-84	-29.9746	4.8575
113	692B-10R-4-91-94	-29.8346	8.612
113	692B-10R-4-101-104	-30.3476	7.9304
113	692B-10R-4-121-125	-29.9279	5.1804
113	692B-10R-4-126-129	-29.8911	5.1875
113	692B-10R-5-11-14	-30.1676	6.9745
113	692B-10R-5-23-26	-30.675	8.608
113	692B-10R-5-50-53	-30.3351	3.2436
113	692B-10R-5-61-63	-30.7881	5.9033
113	692B-10R-5-64-68	-30.5996	7.4142
113	692B-10R-5-80-83	-30.251	3.5895
113	692B-10R-5-90-93	-30.3682	6.256
113	692B-10R-5-103-105	-30.8417	6.8122
113	692B-10R-5-113-115	-30.6457	4.9919
113	692B-10R-5-120-124	-30.9206	6.4596
113	692B-10R-5-139-141	-30.563	3.8419
113	692B-10R-5-148-150	-30.3596	8.3249
113	692B-10R-6-13-16	-30.5534	7.037
113	692B-10R-6-39-42	-30.7289	6.783
113	692B-10R-6-49-51	-30.6146	7.6282
113	692B-10R-6-60-64	-30.6324	4.4071
113	692B-10R-6-82-85	-30.4285	4.73
113	692B-10R-6-109-113	-30.3791	4.5517
113	692B-10R-6-117-120	-30.5181	5.4546
113	692B-12R-1-28-31	-29.9868	4.471
113	692B-12R-1-56-59	-30.7279	4.787
113	692B-12R-1-95-98	-30.0821	4.398
113	692B-12R-2-2-5	-29.4694	7.1788
113	692B-12R-2-29-32	-30.2863	5.204
113	692B-12R-2-52-55	-30.5048	5.13
113	692B-12R-2-61-65	-30.5863	4.6034
113	692B-12R-2-85-88	-30.8391	4.497
113	692B-12R-2-97-101	-31.3605	5.1793
113	692B-12R-2-132-135	-30.939	5.321
113	692B-12R-3-9-12	-31.174	6.9181
113	692B-12R-3-29-32	-30.8682	7.953
113	692B-12R-3-60-64	-31.1975	4.8014
113	692B-12R-3-76-79	-31.0705	7.235
113	692B-12R-3-101-105	-30.696	5.3532
113	692B-12R-3-112-115	-31.493	5.333
		-30.5481	6.81871	avg
		-29.4694	12.519	max
		-31.493	3.2436	min

## Sheet: ODP 692 Rock-Eval
LEG	Sample name	TOC (%)	S1 (mg/g)	S2 (mg/g)	S3 (mg/g)	Tmax (°C)	OI (mg/g)	HI (mg/g)	PI	S1+S2	S2/S3
113	692B-10R-1-25-28	8.006	0.62	42.32	7.01	418	69.3373	418.595	0.0144388	42.94	6.03709
113	692B-10R-3-27-30	9.947	0.5	46.62	5.93	420	59.616	468.684	0.0106112	47.12	7.86172
113	692B-10R-5-23-26	8.608	0.44	44.24	5.5	418	63.8941	513.941	0.00984781	44.68	8.04364
113	692B-12R-1-95-98	4.398	0.19	3.6	2.67	404	55.7761	75.2037	0.0501319	3.79	1.34831
113	692B-12R-3-76-79	7.235	0.19	20.64	4.22	422	79.0262	386.517	0.00912146	20.83	4.891
	avg	7.6388	0.388	31.484	5.066	416.4	65.5299	372.588	0.0188302	31.872	5.63635
	min	4.398	0.19	3.6	2.67	404	55.7761	75.2037	0.00912146	3.79	1.34831
	max	9.947	0.62	46.62	7.01	422	79.0262	513.941	0.0501319	47.12	8.04364

## Sheet: Nannofossil Range chart
ODP Site 692
CORE		SECTION	Top (cm)	Bottom (cm)	depth (m)		A. dietzmannii	B. constans	D. lehmannii	E. hauterivianus	G. meddii	R. asper	R. surirella	S. horticus	Staurolithites sp.	W. barnesiae	W. fossacincta	W. ovata	Z. embergeri	Z. erectus	C. margerelii	W. britannica	C. deflandrei	C. salebrosum	R. angustiforata	Z trivectis	Rucinolithus wisei	D. ignotus	R. laffittei	Tubodiscus sp.	C. conicus	Cretarhabdus sp.	Z. xenotus	H. chiastia	P. fenestrata	S. silvaradius	C. cuvillieri	E. primus	R. crenulata	B. ambiguus	C striatus	M. pemmatoida	W. manivitae	Braarudosphaerid fragments	M. speetonensis	L. armilla
10	R	1	9	12	78.605								R			F/C				R	F			R				R
10	R	1	25	28	78.765							R	R	R		F/C	R	F		R			R	R	R						R		R										R
10	R	1	32	35	78.835			R								F/C	R			R				R		R																		VR
10	R	1	42	45	78.935			R								F/C		R		R				R		R																		VR
10	R	1	87	90	79.385			F					R		R	C/A				F	F			F																			R	C/A
10	R	1	98	101	79.495							R	R		R	C/A	R	R	R		R		R		R								R						R				R
10	R	2	1	4	80.025			F					R	R	R	F/C			R/F	R/F				F
10	R	2	10	13	80.115			R	R							F/C	R	R	R		R		R										R		R								R
10	R	2	23	26	80.245			F	VR				R	R	R	C			R		R/F			F													R						C	C
10	R	2	50	54	80.52			R/F								F	R							R/F
10	R	2	69	72	80.705					R			R	R		F/C	R	R	R		R		R		R						R		R								R			R
10	R	2	96	99	80.975			F				R				C		R		R	F		R	F				R
10	R	2	123	126	81.245			R	1	R		R			R	F/C	R	R					1	R							R		R										R
10	R	3	1	4	81.525		R	F				R/F		R		C/A				R/F			R	F																			R
10	R	3	27	30	81.785			R	1	R		R		R		F/C	R	R		R				R/F	R			R		R	R		R							R			R			R
10	R	3	43	45	81.94			R/F					R			F	R	R		R				R/F
10	R	3	50	54	82.02
10	R	3	70	73	82.215			R/F				R				C								R		R		R
10	R	3	82	85	82.335			R				R	R	R	R	C	R	R	R	R			R	R	R						R		R			R			R	R	R	R
10	R	3	93	96	82.445
10	R	3	115	118	82.665							R	R	R	R	C	R	R		R	R				R								R									R
10	R	3	131	134	82.825			F				R/F	R		R	C		F						F				R
10	R	4	22	25	83.235			R					R	R	R		R	R		R	R		R		R						R									R	R		R
10	R	4	42	45	83.435			R					R			F		R		R
10	R	4	73	75	83.74			F					R		R	C/A		F			F/C			F		F																		F	R
10	R	4	91	94	83.925			R		R		R	R	R	R	C	R	R		R/F	R			R						R	R		R							R
10	R	4	101	104	84.025			F		R		R			R	C				R/F				F	R	R																		F
10	R	5	2	5	84.535		R	F				R	R			C				R			R	R		R																		R
10	R	5	23	26	84.745			R		R		R	R	R	R	C	R	R	R/F	R/F					R			R			R		R			R				R	R	R
10	R	5	39	42	84.905					R	R	R	R	R	R	C/A		R/F	R/F	R			R	F
10	R	5	61	63	85.12			R								F/C		R/F		R
10	R	5	72	75	85.235			R				R	R	R	R	C/A	R	R	F	R/F				F									R											R
10	R	5	80	83	85.315			F				R				A				R			R	F
10	R	5	90	93	85.415											C	R
10	R	5	113	115	85.64			VR	VR							R
10	R	5	139	141	85.9			R/F					R	R	R	C/A		R/F	R/F	R			R	F
10	R	6	1	5	86.03			F	R			R	R		R	C/A					R/F			F		R/F																R
10	R	6	13	16	86.145		R		R			R	R			C	R	R	R/F		R				R						R		R									R	R
10	R	6	25	27	86.26			F					R			F/C		R/F	R/F	R				F
10	R	6	49	51	86.5			F					R	R	R	C/A		R/F	R/F	R	R	R		F									R
10	R	6	71	74	86.725		R	R								R/F		R						R
10	R	6	82	85	86.835		R	R	R	R		R		R	R	F	R	R	R/F	R/F	R				R			R	R	R	R		R	R		R	R			R	R
10	R	6	96	98	86.97				R							F
10	R	6	117	120	87.185		R	F	R	R		R	R	F	R	C/A		R		R				F		R/F							R
12	R	1	12	14	88.33			R	R							F		R			F	R		R/F	R
12	R	1	28	31	88.495	barren
12	R	1	41	44	88.625											F					R			R	R
12	R	1	56	59	88.775	barren
12	R	1	71	74	88.925	barren
12	R	1	80	83	89.015			R							R	F			R/F			R	R			R	R	R
12	R	1	100	104	89.22	barren
12	R	1	118	121	89.395	barren
12	R	2	2	5	89.735	barren
12	R	2	10	13	89.815											F		R/F	R			R/F					R
12	R	2	29	32	90.005		R	R	R	R	R		R		R	F	R		R		R								R	R	R						R		R	R
12	R	2	45	48	90.165	barren
12	R	2	71	73	90.42	barren
12	R	2	85	88	90.565	barren
12	R	2	105	110	90.775		R	R/F	R	R					R	F/C					R/F			R/F					R	R								R
12	R	2	119	122	90.905				VR							C		R	R		R/F	R/F		R		R	R										R
12	R	2	132	135	91.035		R	R	R			R	R		R	C	R	R	R	F	R/F		R	R	R		R		R	R	R		R	R	R	R
12	R	2	142	145	91.135			F	R		R		R			A		A		F	F	R/F		F
12	R	3	9	12	91.305	barren
12	R	3	18	21	91.395						R		R			F		F		R	R			R								R
12	R	3	29	32	91.505		R	R				R				F	R		R	R/F										R	R	R
12	R	3	42	45	91.635			R	R/F		R	R	R		R	A		R	R	R							R	R	R
12	R	3	65	68	91.865			F			R										R		R	F	R	R
12	R	3	85	88	92.065			VR	R				R			C		F/C		R	R/F	F
12	R	3	93	96	92.145				R							R/F		R/F
12	R	3	112	115	92.335		R	R	R	R	R	R	R	R	R	F	R	R	R	R/F

## Sheet: ODP 692 Littler et al., 2011
Additional ODP Site 692 data
Ref.	Sample name	TEX86	GDGT-index 2 (TEX-H)		SST - TEX-H	TEX86-LINEAR	(0-200m) T-H	(0-1000m) T-H		SST - TEX-H (deep restricted)	BAYSPAR 5th	BAYSPAR 50th	BAYSPAR 95th		TOC%
Littler et al. (2011)	692B-10-01, 102cm	0.678861	-0.168219		27.0938	28.7565	21.4984	15.4367		20.7293	21.0247	26.5861	32.1809		8.83017
Littler et al. (2011)	692B-10-02, 131 cm	0.695034	-0.157994		27.7932	29.7079	22.0577	15.8538		21.3049	22.2928	27.7945	33.5935		9.67751
Littler et al. (2011)	692B-10-05, 108 cm	0.73586	-0.133205		29.4888	32.1094	23.4137	16.8652		22.7006	24.7872	30.2418	36.4944		5.05882
Littler et al. (2011)	692B-12 01, 53 cm	0.726758	-0.13861		29.1191	31.574	23.118	16.6447		22.3963	24.1819	29.6323	35.7728		3.78411
Littler et al. (2011)	692B-12-02, 107 cm	0.74568	-0.127447		29.8826	32.6871	23.7286	17.1001		23.0247	25.3991	30.8526	37.1847		5.10151
